RESEARCH ARTICLE

# Comparative Transcriptome Analysis of Resistant and Susceptible Common Bean Genotypes in Response to Soybean Cyst Nematode Infection

Shalu Jain<sup>1\*</sup>, Kishore Chittem<sup>1</sup>, Robert Brueggeman<sup>1</sup>, Juan M. Osorno<sup>2</sup>, Jonathan Richards<sup>1</sup>, Berlin D. Nelson, Jr.<sup>1</sup>

**1** Department of Plant Pathology, North Dakota State University, Fargo, North Dakota, 58108, United States of America, **2** Department of Plant Sciences, North Dakota State University, Fargo, North Dakota, 58108, United States of America

\* [shalu.jain@ndsu.edu](mailto:shalu.jain@ndsu.edu)

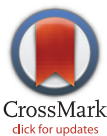

**OPEN ACCESS**

**Citation:** Jain S, Chittem K, Brueggeman R, Osorno JM, Richards J, Nelson BD, Jr. (2016) Comparative Transcriptome Analysis of Resistant and Susceptible Common Bean Genotypes in Response to Soybean Cyst Nematode Infection. PLoS ONE 11(7): e0159338. doi:10.1371/journal.pone.0159338

**Editor:** Istvan Rajcan, University of Guelph, CANADA

**Received:** March 28, 2016

**Accepted:** June 30, 2016

**Published:** July 21, 2016

**Copyright:** © 2016 Jain et al. This is an open access article distributed under the terms of the [Creative Commons Attribution License](https://creativecommons.org/licenses/by/4.0/), which permits unrestricted use, distribution, and reproduction in any medium, provided the original author and source are credited.

**Data Availability Statement:** All relevant data are within the paper and its Supporting Information files.

**Funding:** This work was supported by the Specialty Crop Grant Northarvest Bean Grower association. The funder had no role in study design, data collection and analysis, decision to publish, or preparation of the manuscript.

**Competing Interests:** The authors have declared that no competing interests exist.

## Abstract

Soybean cyst nematode (SCN; *Heterodera glycines* Ichinohe) reproduces on the roots of common bean (*Phaseolus vulgaris* L.) and can cause reductions in plant growth and seed yield. The molecular changes in common bean roots caused by SCN infection are unknown. Identification of genetic factors associated with SCN resistance could help in development of improved bean varieties with high SCN resistance. Gene expression profiling was conducted on common bean roots infected by SCN HG type 0 using next generation RNA sequencing technology. Two pinto bean genotypes, PI533561 and GTS-900, resistant and susceptible to SCN infection, respectively, were used as RNA sources eight days post inoculation. Total reads generated ranged between ~ 3.2 and 5.7 million per library and were mapped to the common bean reference genome. Approximately 70–90% of filtered RNA-seq reads uniquely mapped to the reference genome. In the inoculated roots of resistant genotype PI533561, a total of 353 genes were differentially expressed with 154 up-regulated genes and 199 down-regulated genes when compared to the transcriptome of non-inoculated roots. On the other hand, 990 genes were differentially expressed in SCN-inoculated roots of susceptible genotype GTS-900 with 406 up-regulated and 584 down-regulated genes when compared to non-inoculated roots. Genes encoding nucleotide-binding site leucine-rich repeat resistance (NLR) proteins, WRKY transcription factors, pathogenesis-related (PR) proteins and heat shock proteins involved in diverse biological processes were differentially expressed in both resistant and susceptible genotypes. Overall, suppression of the photosystem was observed in both the responses. Furthermore, RNA-seq results were validated through quantitative real time PCR. This is the first report describing genes/transcripts involved in SCN-common bean interaction and the results will have important implications for further characterization of SCN resistance genes in common bean.

## Introduction

Common bean (*Phaseolus vulgaris* L.) is the most important edible legume crop worldwide with crop value equal to the combined value of all other food legumes such as pea (*Pisum sativum* L.), chickpea (*Cicer arietinum* L.), peanut (*Arachis hypogaea* L.) and lentil (*Lens culinaris* Medik.) [1, 2]. Beans are the primary source of protein (22% of seed weight) for over 4 billion people in developing countries (FAO: <http://faostat.fao.org/>). Beans in combination with cereals are a complete source of proteins and other micro/macronutrients and can help eliminate malnutrition. North Dakota and northern Minnesota are the top producers of beans in the United States with about 50% of the production (<http://www.usdrybeans.com/resources/production/production-facts/>). Principal market classes grown in this region are pinto, navy, black, and kidney beans.

Soybean cyst nematode (*Heterodera glycines* Ichinohe; SCN) is an obligate sedentary endoparasite and the most destructive pathogen of soybean (*Glycine max* L.) in the world causing losses of approximately \$1 billion annually in the USA alone [3]. SCN does not cause unique aboveground symptoms and can be confused with symptoms of nutrient deficiency, drought stress, herbicide injury or soil-borne fungal disease. SCN can spread readily from field to field in soil particles on farm machinery. SCN has been found in every soybean producing state in the United States except New York and West Virginia [4]. In North Dakota and northern Minnesota, SCN was first found in soybean fields in 2003. There are differences in virulence within the SCN population with virulent types termed HG types. In North Dakota and northern Minnesota the predominant virulent type is HG 0, previously known as race 3. The primary management of SCN in soybean is the use of resistant cultivars and crop rotation with non-host crops to reduce nematode populations in the soil [5]. The soybean genotypes Peking and PI88788 are the major sources of SCN resistance in commercial soybean varieties. However, due to shifts in virulent HG types, the major source of SCN resistance from PI88788 used in most commercial soybean cultivars is now less effective in some US production areas since new HG types such as HG 2.5.7 can reproduce on that resistance source [6]. Thus, it is imperative to identify novel resistance genes from different sources to incorporate more effective genes into cultivars for resistance to predominant SCN HG types. Resistance to SCN is quantitative and major QTLs have been mapped on chromosomes 18 (*rhg1*) and 8 (*Rhg4*) in many soybean cultivars [7]. The SCN resistance of *rhg1* is contributed by multi-copy *rhg1* haplotypes forming two distinct resistant groups i.e. high copy number *rhg1* accessions and low copy number *rhg1* accessions [8]. High copy number *rhg1* group (PI 88788-type) contain 7–10 copies of a 31 kb *rhg1* repeat segment while the low copy number *rhg1* group (Peking-type) contains 3 copies of the *rhg1* repeat along with a newly identified allele of Glyma18g02590. Three different genes encoding a predicted amino acid transporter (Glyma18g02580), an  $\alpha$ -SNAP protein (Glyma18g02590) and a protein with wound-inducible protein 12 (WI12) (Glyma18g02610) are present in 31 kb *rhg1* repeat segment and contribute to SCN resistance [8]. The SCN resistance of *Rhg4* is controlled by a serine hydroxymethyl transferase gene [9]. *Rhg4* exhibits dominant gene action for resistance to race 3 of SCN [10] <http://www.nature.com/nature/journal/v492/n7428/full/nature11651.html-ref5> and is one of the major QTLs controlling soybean resistance to SCN race 3 (HG type 0) in cv. Forrest [11]. Roots of plants carrying *Rhg* genes are penetrated by infective juveniles, but feeding cells ultimately degenerate, causing the nematodes to die before reaching adult stages.

Some common bean genotypes are considered excellent hosts for SCN [12]. Averaged over a selection of genotypes, Poromarto and Nelson [13] reported that kidney beans are highly susceptible, navy and pinto beans are moderately susceptible and black beans are moderately resistant. These results indicated high susceptibility to moderate resistance that could be grouped

by market class and/or genetic origin and background. The reduction of plant growth and seed yield in three different bean classes (pinto, kidney and navy) from HG 0 under field conditions indicated a potential threat to the common bean industry [14]. There is serious concern that SCN could become a major problem for common bean production in the North Dakota-Minnesota region. Black bean is one of the major classes in this region and is moderately resistant. However, there are no known commercial bean varieties with high levels of resistance to SCN in the other three major bean classes, i.e. pinto, navy and kidney, grown in this area. This potential threat of SCN to common bean production has initiated breeding efforts at North Dakota State University to incorporate SCN resistance into bean germplasm for eventual production of SCN resistant varieties.

Screening of the USDA core collection of *Phaseolus vulgaris* germplasm against SCN HG type 0 has identified resistant genotypes in some accessions [15]. However, the genetic control of SCN resistance in common bean is completely unknown. Understanding the genetics of resistance will aid in the development of resistant varieties. In addition, the findings from common bean could have applications in soybean as well given the high level of synteny reported between the two species at the genomic level [16].

Common bean ( $2n = 22$ ) belongs to the Leguminosae (Fabaceae) family. It has a genome size of approximately 521.1 Mbp consisting of few duplicated loci [17] and about 49% transposable elements [18]. With the availability of genome sequence information for common bean [17], transcriptome analyses may be a fast and cost-effective way to find differentially expressed genes under biotic stress, ultimately leading to the characterization of signaling pathways in the SCN defense response. With the advent of next-generation sequencing technologies that provide relatively cheap deep-sequencing, RNA-seq has become the best approach for transcriptome profiling [19]. Comparative transcriptome analysis using RNA-seq has been successfully performed in various non-model and model species [20]. RNA-seq has been successfully used in identifying differentially expressed genes (DEGs) during SCN infection in soybean [21, 22] and cereal cyst nematode infection in *Aegilopus variabilis* [23]. However, similar studies have not been conducted in common bean. Resistance genes to SCN HG types have been identified in soybean and are frequently utilized in breeding programs to develop resistant cultivars [24, 25]. Soybean is a close relative to common bean and extensive macrosyntentic relationships exist between the species [16, 26]. The synteny blocks between these two species can help in identifying the orthologous genes in common bean involved in the SCN resistance mechanism. The availability of the RNA-seq information of common bean will accelerate the gene identification related to SCN resistance.

To understand the mechanism of SCN resistance in common bean, it is necessary to characterize differential gene expression as the result of the host parasite interactions which will provide clues to the physiological changes and reprogramming that occur in the host during compatible and incompatible interactions. Such information could lead to the identity of host genes involved in the resistance response and provide valuable clues as to the specific mechanisms involved in resistance. In addition, the identity of those genes with functional polymorphism contributing to incompatible interactions with SCN could improve our ability to identify resistance in common bean germplasm and improve the breeding efforts by identifying molecular markers to incorporate resistance into commercial bean varieties. The objective of this study was to identify differentially expressed genes that are biologically relevant for establishment of incompatibility during SCN infection in common bean and lay the foundation for identification of genes involved in resistance mechanisms. The study also provides a transcriptome framework for comparing and identifying differential physiological changes occurring in resistant and susceptible plants during SCN infection.

## Materials and Methods

### Plants, egg sources and inoculation

Two pinto bean genotypes GTS-900 and PI533561 were used for the analysis in this study. GTS-900 is a pinto bean variety released by GEN-TEC seeds Ltd. with high seed quality and is resistant to race 1 of bean common mosaic virus and anthracnose. Additionally, GTS-900 is susceptible to SCN HG type 0 [13, 15]. Pinto bean plant introduction (PI) line PI533561 was selected from the USDA core collection of *Phaseolus vulgaris* based on resistance to SCN HG 0 and good agronomic qualities such as plant architecture, seed shape and color and overall plant health. The plant growth system and inoculation method were described previously [13]. Following surface disinfection with 1.0% NaOCl and a subsequent water rinse, seeds were germinated on germination paper for 3 days. Healthy germinated seedlings of uniform size were transplanted into individual plastic “Cone-tainers” (Suewe & Sons, type SC10 Super Cell) containing autoclaved river sand, then inoculated with 2000 eggs of SCN HG type 0 in a water suspension. The SCN egg source was originally obtained from an infested soybean field in North Dakota. Control plants were mock-inoculated with water. The Cone-tainers were placed in autoclaved sand in plastic pots, 30.5 cm in diameter by 30.5 cm deep (Cambro, Huntington Beach, CA), and immersed in a water bath at  $27\pm 3^{\circ}\text{C}$  in a greenhouse. Plants received both natural and supplemental light using high-pressure sodium lamps ( $1,000\ \mu\text{E m}^{-2}\ \text{s}^{-1}$ ) for 16 h/day. Before conducting the gene expression profiling, the resistance response of the two genotypes was verified by inoculating five plants from each genotype, then determining the female index after 30 days growth at  $27\pm 3^{\circ}\text{C}$ . Female index is a measurement of the ability of a SCN population to reproduce on a genotype and was calculated as described in Poromarto and Nelson [13].

### Total RNA extraction and purification of mRNA from total RNA

Two independent biological replicates per treatment were grown at different times under the same conditions as described above and entire root tissue was collected eight days post inoculation (dpi) with SCN. Roots were washed in tap water to remove sand and then stored in liquid nitrogen until RNA extraction. Treatments were as follow: PI 533561 non-inoculated (RC), PI 533561 SCN inoculated (RI), GTS-900 non-inoculated (SC), and GTS-900 SCN inoculated (SI). Root tissue (100 mg) was frozen in liquid nitrogen and ground to a fine powder with a mortar and pestle. A total of 3 ml of TRIzol (Invitrogen, Carlsbad, CA, USA) was added to the ground tissue and the sample was split in half for column purification with the TRIzol Plus RNA purification kit (Invitrogen, Carlsbad, CA, USA). The additional step of on-column DNA digestion was performed with DNase I (Invitrogen, Carlsbad, CA, USA) to remove contaminating DNA. RNA was eluted in 250  $\mu\text{l}$  of water per spin column. Equal amount of RNA from five individual plants per replicate of each treatment were pooled together for further analysis. Poly-A RNA was isolated from total RNA with the MicroPoly(A)Purist™ kit using the mRNA spin-column protocol (Ambion Inc., Austin, Texas, USA). A second round of oligo (dT) selection was performed and purified mRNA was eluted in a total of 20  $\mu\text{l}$  of RNA storage solution. Total RNA and mRNA quality was assessed with an RNA 6000 Pico kit on an Agilent 2100 Bioanalyzer (Agilent Technologies, Santa Clara, CA, USA).

### Fragmentation, cDNA synthesis, library and template preparation and sequencing

Purified mRNA was used to construct a full length cDNA pool using Ion Total RNA-Seq Kit v2 (Life Technologies, Carlsbad, CA, USA). The diluted cDNA library was sequenced as per manufacturer’s instructions on Ion Torrent PGM™ sequencer at North Dakota State University.

## Mapping reads to reference genome

Quality checks for the RNA-seq libraries were performed using FastQC (<http://www.bioinformatics.bbsrc.ac.uk/projects/fastqc>) and FastX toolkit ([http://hannonlab.cshl.edu/fastx\\_toolkit/](http://hannonlab.cshl.edu/fastx_toolkit/)). Estimates of over-represented sequences and quality score distribution were obtained from FastQC. FastX\_clipper, and Fastx\_quality\_trimmer programs of FastX tool kit were used to remove adaptor sequences and retain reads that had a minimum length of 36 bp with a minimum quality score of 20. Reads were mapped to the *Phaseolus vulgaris* reference genome assembly (<ftp://ftp.jgi-psf.org/pub/comp/gen/phytozome/v9.0/Pvulgaris/>) using TMAP 3.4.1 (<http://github.com/iontorrent/tmap>).

## Calculation, normalization, and profiling of gene expression

Alignments generated using TMAP were used for transcript abundance estimation and differential gene expression analyses as described in Trapnell et al. [27]. Normalized transcript abundances were estimated as fragments per kilobase per million mapped reads (fpkm) using Cufflinks version 2.1.1 [28]. Differential gene expression analysis was conducted using CuffDiff program of Cufflinks [29] at a false discovery rate (FDR) of 0.05 after Benjamini-Hochberg correction for multiple testing. Genes were considered significantly differentially expressed only when the fold change was at least two ( $>1$  or  $< -1$  in log<sub>2</sub> ratio value), and  $P < 0.05$ . Venn diagrams were prepared using VENNY [30] to compare resistant and susceptible DEGs.

## Gene Ontology and enrichment analyses

DEGs were mapped to Gene Ontology (GO) database using Blast2GO (<http://www.blast2go.de>) [31]. For the GO functional enrichment procedure, the total gene set was considered as a background list and DEGs as the screened list obtained from the background list to calculate p-values using hyper-geometric test (<http://geneontology.org/page/go-enrichment-analysis>). A functional category was considered significantly enriched only when the p-value for that category was  $< 0.05$ . Significantly enriched DEGs were assigned to categories of biological processes since they represent an overall biological objective that a gene or gene product contributes to a cellular response to a biotic stress [32].

## Validation of RNA-seq data by quantitative real time PCR (qPCR)

Based on potential functional importance, 10 genes were selected for validation by qPCR. Primers were designed using Primer-Blast [33] using default parameters from exon sequences covering introns. qPCR was performed using two biological replicates in two steps. First, RNA was reverse transcribed using QuantiTect<sup>R</sup> reverse transcription kit (Qiagen, Valencia, CA, USA), which includes genomic DNA elimination as well as reverse transcription. The second step was performed using iTaq Universal SYBR green supermix (BioRad, Hercules, CA) in a BioRad iQ<sup>TM</sup> 5 real-time PCR system following these cycle conditions: 95°C for 30 sec, followed by 40 cycles of 95°C for 10 sec, and 30 s at 60°C. Relative expression levels were calculated using the  $2^{-\Delta\Delta C_t}$  method for each gene and were normalized to the geometric average of Ct (threshold cycle) values of the internal reference gene *Actin 11* [34].

## Results and Discussion

### Resistance and susceptibility reaction of genotypes

Female cysts were counted after 30 dpi with SCN as described by Poromarto and Nelson [13]. Average Female indices of 13.5 and 40.3 were obtained for PI 533561 and GTS-900, respectively. According to the Schmitt and Shannon scale [35] soybean reactions to SCN are

categorized as the following: FI <10 = resistant, FI 10 to 30 = moderately resistant, FI 31 to 60 = moderately susceptible, and FI >60 = susceptible. The same scale was used to classify different market classes of common bean in previous studies [12, 13]. Therefore, PI533561 was considered moderately resistant and GTS-900 was considered moderately susceptible, which corroborated the earlier studies conducted on bean genotypes [13, 14].

### Ion-Torrent sequencing and aligning to the reference genome

For an in-depth analysis of the transcriptional reprogramming induced in infected common bean roots, RNA-seq was carried out on isolated RNA 8 days after infection of resistant and susceptible pinto bean genotypes. The RNA-seq method generates absolute information rather than relative gene expression measurements; thus, it avoids many of the inherent limitations of microarray analysis. This method was used to analyze differences in gene expression between the resistant and susceptible genotypes. We sequenced two biological replicates of cDNA libraries from the four treatments, RC, RI, SC and SI. The number of sequence reads generated ranged between ~ 3.2 and 5.7 million per library as presented in Table 1. Each library produced reads ranging from 50–250 bp in length. GC percent of sequence data from the four libraries were all approximately 46–49% for each library. Approximately 70–93% of the filtered reads from RC, RI, SC and SI libraries, aligned uniquely to the reference genome and were used for further analysis.

### Differentially expressed genes among the SCN inoculated vs. non-inoculated plants

The fold change for transcripts in the four treatments were used as an index for estimating the relative abundance and expression levels between SCN-infected common bean roots and non-infected roots. Transcriptome dynamics of both inoculated genotypes of *P. vulgaris* compared to non-inoculated samples were visualized using MA-plots (the log<sub>2</sub> fold change in expression plotted against mean of normalized counts; (Fig 1)). A large set of genes were differentially expressed in both the genotypes (S1 and S2 Tables). There were 353 DEGs between RI and RC treatments of the resistant genotype PI533561, of which 154 genes were up-regulated and 199 genes were down-regulated. In the susceptible genotype GTS-900, 990 DEGs were detected between SI and SC samples, among which expression levels of 406 genes were up-regulated, and 584 genes, were down-regulated. Despite their different genetic backgrounds, 124 genes that showed differential expression were common between GTS-900 and PI533561 genotypes (Fig 2). The two genotypes shared 36 up-regulated DEGs and 55 down-regulated DEGs, which indicates some common pathways for the response to SCN infection. Fifteen of the up-

**Table 1. Statistics of raw data for *P. vulgaris* L. transcriptome in resistant (R) and susceptible (S) genotypes 8 days post inoculation (I) and non-inoculation (C).**

| Line | Replicates | Total Reads | Filtered Reads | Uniquely Aligned Reads | % alignment |
|------|------------|-------------|----------------|------------------------|-------------|
| RI   | 1          | 5052999     | 2968917        | 2470450                | 83.21047709 |
| RI   | 2          | 3471704     | 3471704        | 2714159                | 78.17944733 |
| RC   | 1          | 5302648     | 4742298        | 4378694                | 92.3327467  |
| RC   | 2          | 3295422     | 3263054        | 2355402                | 72.18397244 |
| SI   | 1          | 3548737     | 3161497        | 2798816                | 88.52818775 |
| SI   | 2          | 4413126     | 4395535        | 3216547                | 73.17759954 |
| SC   | 1          | 5694734     | 5091987        | 4753670                | 93.35589427 |
| SC   | 2          | 5416888     | 5395339        | 3805033                | 70.52444712 |

doi:10.1371/journal.pone.0159338.t001

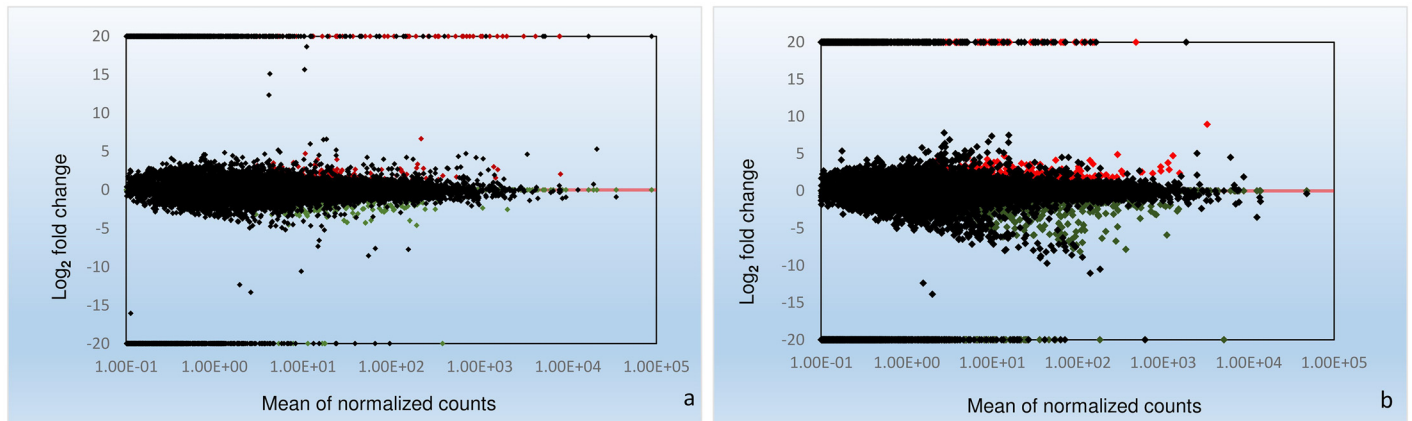

**Fig 1. Transcriptome dynamics reveal different patterns of gene regulation in resistant and susceptible common bean–*Heterodera glycines* interactions.** MA-plots displaying the  $\log_2$  fold change in the expression plotted against mean of normalized counts in a. resistant genotype inoculated vs. resistant genotype non-inoculated (RI vs. RC) b. susceptible genotype inoculated vs. susceptible genotype non-inoculated (SI vs. SC). Y-axes indicate fold change values ( $p < 0.05$ ) and x-axes indicate mean of normalized counts. Differentially expressed genes (DEGs) are shown in green, black and red indicating down-regulated, no change and up-regulated genes respectively.

doi:10.1371/journal.pone.0159338.g001

regulated genes in the resistant genotype were down-regulated in the susceptible genotype following infection. Furthermore, 18 genes showed down-regulation in the resistant genotype that were up-regulated in the susceptible genotype in response to SCN (Fig 2). A heat map of differentially expressed genes (Fig 3) clearly shows both resistant and susceptible genotypes have some similar responses to SCN infection for some DEGs. DEGs were annotated as per the highest amino acid homology with the corresponding annotation and GO categories were assigned to them (S3 and S4 Tables). The data illustrated differences between the resistant and susceptible genotypes during the interaction with SCN and deep analysis of these genes may shed light on the resistance mechanism in common bean. However, some of the changes in gene expression will be due to the difference in genetic background of these genotypes.

Insights into the SCN-soybean interaction were obtained through microarray studies and the identification of genes involved in metabolism, energy, defense and other host pathways that were associated with SCN resistance [36, 37, 38, 39]. RNA-seq has been used in some recent studies involving soybean/SCN interactions [21, 22, 40, 41]. Resistant and susceptible responses of the soybean genotype Peking to incompatible and compatible populations of SCN were studied by Kink et al. [37, 38]. They observed that during the first attempts of the nematode to establish in the host the gene expression patterns in roots were similar in both the susceptible and resistant reactions [37, 38]. Gene expression patterns were different however, during the second phase of infection depending on the resistance/susceptibility of the plant, however syncytia were formed in both cases [38, 42, 43]. At 8 dpi, the syncytia degraded during the resistance response, whereas the syncytia were still developing and provided nourishment to the nematode in the susceptible interaction [37]. In the soybean genotype Peking, differences in gene expression in the syncytium are specific transcriptomic responses during both the resistant and susceptible reaction to two different populations of SCN [42].

There are substantial reports regarding the role of kinases in stress response in common bean [44, 45]. Kinase signaling appears to have an important role in the resistance/susceptibility reaction of common bean genotypes in response to pathogens [46, 47]. In soybean, up-regulation of the MAP3K homolog implicated the role of mitogen-activated protein kinase signaling in the regulation of resistance to SCN [39]. A heat map of differentially expressed kinase genes is shown in Fig 4. Different classes of protein kinases were upregulated and

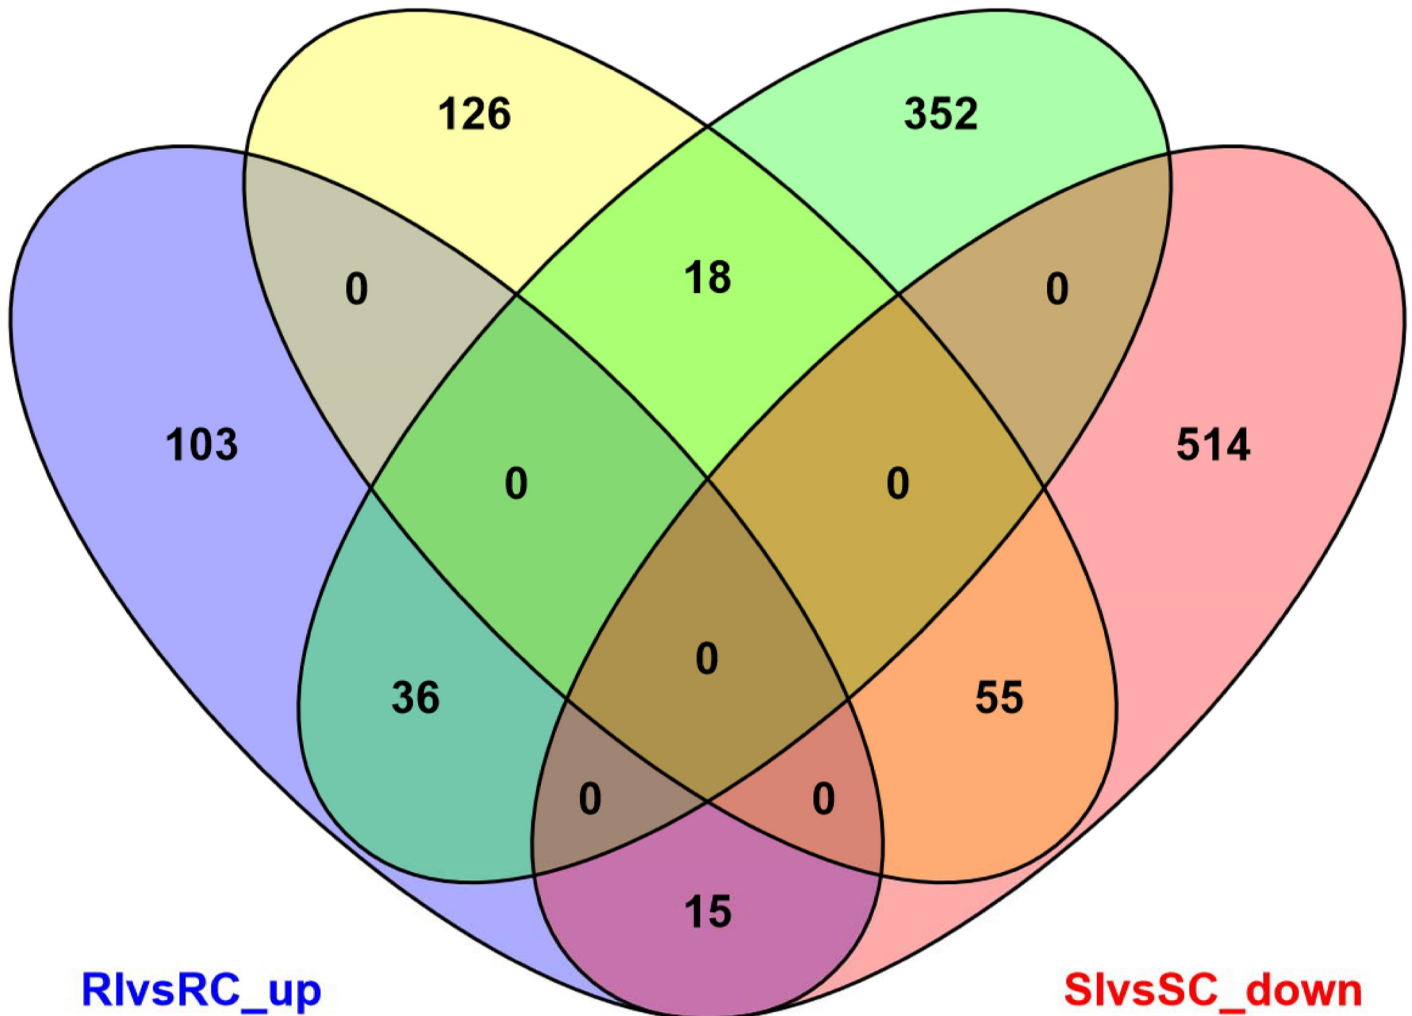

**Fig 2. Venn diagram showing differentially expressed genes in common bean–*Heterodera glycines* interactions.** RlvsRC up = up-regulated genes in resistant genotype after inoculation (blue); RlvsRC\_down = down-regulated genes in resistant genotype after inoculation (yellow); SlvsSC\_up = up-regulated genes in susceptible genotype after inoculation (green); SlvsSC\_down = down-regulated genes in susceptible genotype after inoculation (red). Common genes between these treatments are shown in the shaded areas. RI and RC = resistant genotypee inoculated and non-inoculated, respectively; SI and SC = susceptible genotype inoculated and non-inoculated, respectively.

doi:10.1371/journal.pone.0159338.g002

downregulated in the resistant genotype. One of the upregulated DEGs (Phvul.009G180700) was annotated as a leucine-rich repeat protein kinase family protein. On the other hand, 27 protein kinases were induced and 18 protein kinases were down-regulated in the susceptible genotype. One of the transmembrane protein kinase tmk1-like genes (Phvul.003G015800) was upregulated in GTC-900 and has 51% similarity with the *Rhg4* like gene (GeneBank ID: NP\_001236710) in soybean.

Heat maps of defense related genes and transcription factors (TFs) are presented in Figs 5 and 6, respectively. Nineteen DEGs were found to be associated with defense related functions and two of them (Phvul.010G132200 and Phvul.008G037300) were upregulated in both genotypes. An important candidate gene for SCN resistance may be the disease resistance protein TIR-NBS-LRR (Phvul.010G054400), which was expressed only during SCN infection in the resistant genotype. The most represented group of disease resistance genes (R genes) in plants cloned to date are NLR proteins characterized by nucleotide-binding site (NBS) and leucine-



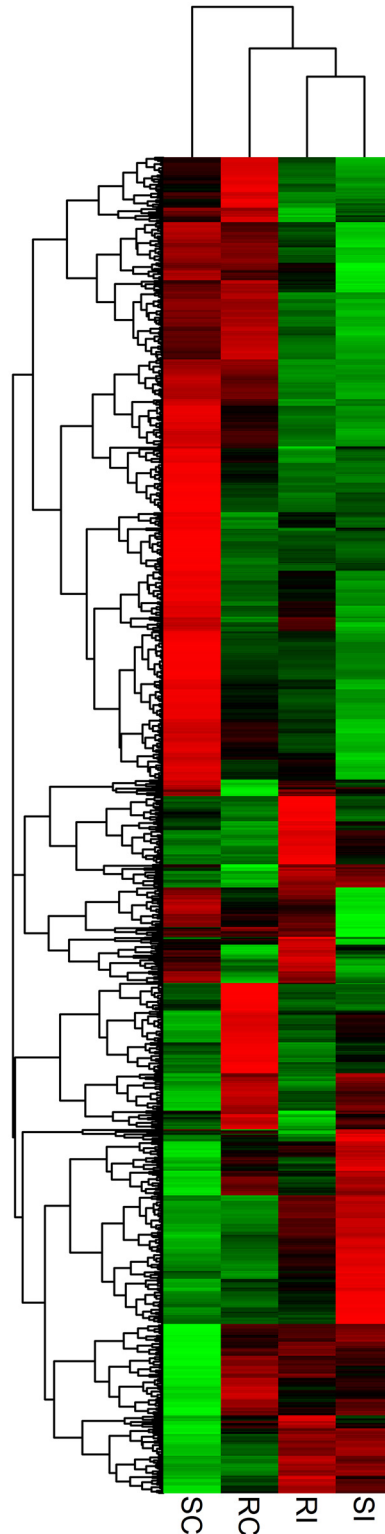

**Fig 3. Expression analysis of differentially expressed genes in response to common bean-*Heterodera glycines* interaction.** Heat maps are arranged according to their hierarchical clustering based on expression pattern of the genes. From left to right, the four columns respectively show the expression of genes in the non-inoculated susceptible genotype (SC), the non-inoculated resistant genotype (RC), the SCN inoculated resistant genotype (RI) and the inoculated susceptible genotype (SI). Green, black and red indicate low, no change and high expression levels of genes, respectively.

doi:10.1371/journal.pone.0159338.g003

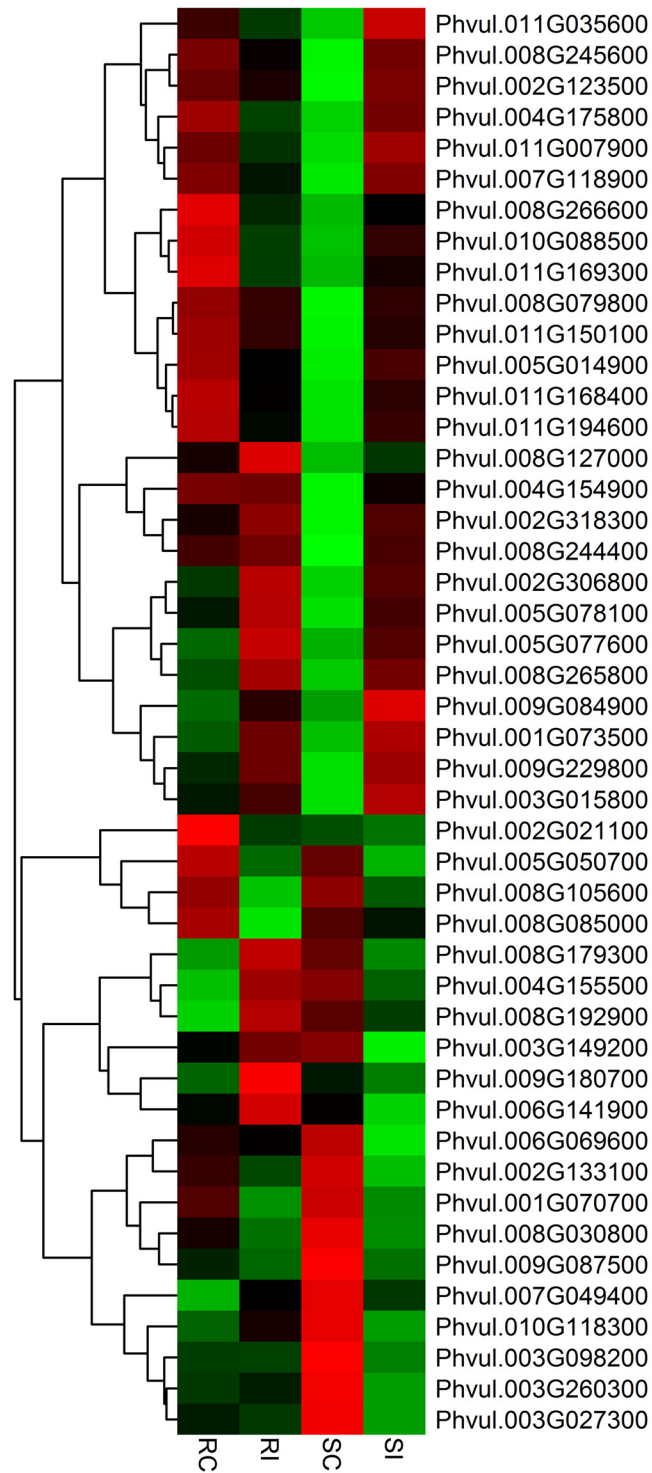

**Fig 4. Expression analysis of differentially expressed kinases in response to common bean-*Heterodera glycines* interaction.** Heat maps are arranged according to their hierarchical clustering based on expression pattern of the genes. From left to right, the four columns respectively show the expression of genes in the non-inoculated resistant genotype (RC), the SCN inoculated resistant genotype (RI), the non-inoculated susceptible genotype (SC) and the inoculated susceptible genotype (SI). Green, black and red indicate low, no change and high expression levels of genes, respectively.

doi:10.1371/journal.pone.0159338.g004

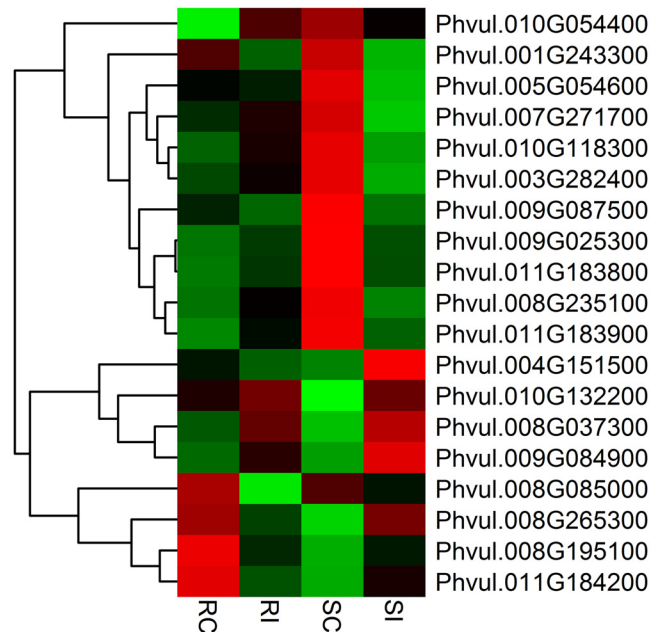

**Fig 5. Expression analysis of differentially expressed defense related genes in response to common bean–*Heterodera glycines* interaction.** Heat maps are arranged according to their hierarchical clustering based on expression pattern of the genes. From left to right, the four columns respectively show the expression of genes in the non-inoculated resistant genotype (RC), the SCN inoculated resistant genotype (RI), the non-inoculated susceptible genotype (SC) and the inoculated susceptible genotype (SI). Green, black and red indicate low, no change and high expression levels of genes, respectively.

doi:10.1371/journal.pone.0159338.g005

rich repeat (LRR) domains as well as variable amino- and carboxy-terminal domains [48]. These large proteins are abundant in plant genomes and are actively involved in plant resistance to diverse pathogens such as bacteria, viruses, fungi, nematodes, insects and oomycetes [49]. For example, two homologues of a leucine-zipper, nucleotide-binding site, leucine-rich repeat (LZ-NBS-LRR) R gene family, *Gpa2* and *Rx1* genes, confer resistance to potato virus X, and potato cyst nematode (*Globodera pallida*) respectively [50]. To support the functional correlation between NLR genes and disease resistance in soybean, genome wide QTL analysis was conducted and the analysis determined that QTLs located near the NLR gene cluster were not specific for one particular disease but rather for several pathogens and pests including fungi, bacteria and nematodes [51]. Most importantly, NLR resistance proteins were involved in regulating SCN interactions in SCN resistant soybean varieties when examined with whole-genome gene expression profiling [41]. Further molecular characterization of NLR genes in SCN resistant common bean will help elucidate the resistance mechanism to SCN and other pathogens.

Our analysis revealed that expression of 30 TFs changed significantly in response to SCN infection in both common bean genotypes. Two WRKY transcription factors (Phvul.001G042200 and Phvul.008G081800) were upregulated in the resistant plants after SCN infection while 5 WRKY transcription factors (Phvul.001G042200, Phvul.002G265400, Phvul.005G080300, Phvul.008G081800, Phvul.009G043100) were upregulated in the susceptible plants. WRKY DNA-binding protein 40 (Phvul.001G042200) and WRKY DNA-binding protein 70 (Phvul.008G081800) were upregulated in both the genotypes indicating similar response of those factors to SCN infection. The role of WRKY transcription factors was investigated in regulation of reactive oxygen species (ROS) through genetic analysis with double mutants in

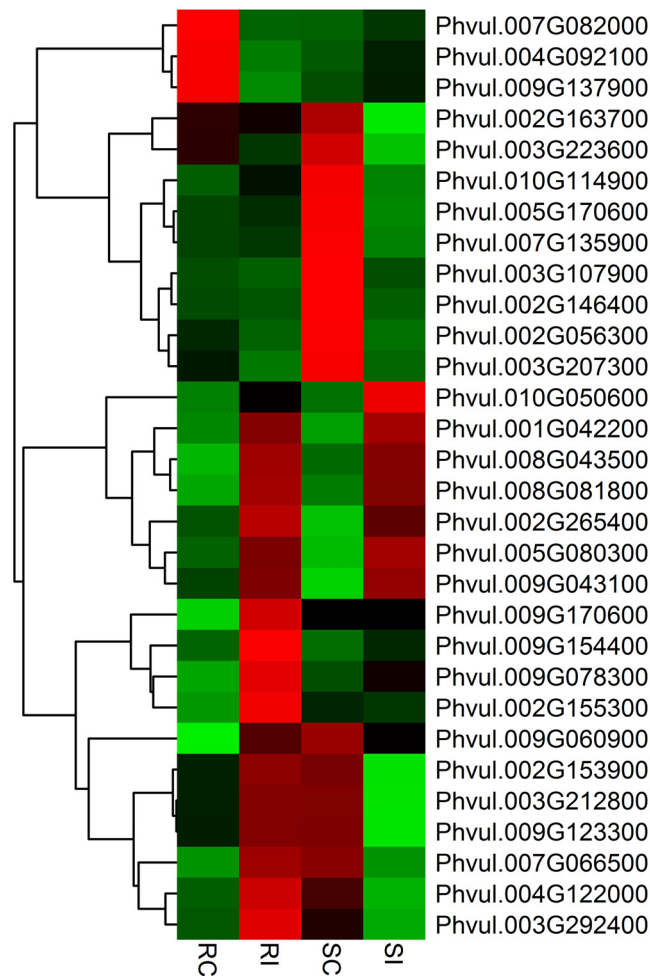

**Fig 6. Expression analysis of differentially expressed transcription factors in response to common bean–*Heterodera glycines* interaction.** Heat maps are arranged according to their hierarchical clustering based on expression pattern of the genes. From left to right, the four columns respectively show the expression of genes in the non-inoculated resistant genotype (RC), the inoculated resistant genotype (RI), the non-inoculated susceptible genotype (SC) and the inoculated susceptible genotype (SI). Green, black and red indicate low, no change and high expression levels of genes, respectively.

doi:10.1371/journal.pone.0159338.g006

*Arabidopsis* by Brosché et al. [52]. The results indicated that these TFs were involved in regulation of ROS induced programmed cell death along with SGT1b, a component of ubiquitin mediated protein degradation. A key role of ROS was found in the hypersensitive response during R-mediated resistance mechanisms to different pathogens [53] and genes involved in regulating ROS are often up-regulated [52]. Genes having a role in ROS scavenging pathways such as glutathione transferase, heat shock proteins and peroxidases were differentially expressed in both the genotypes. Differential expression of genes related to cell wall synthesis and remodeling in common bean were also shown in this study. The components of plant cell walls are modified during attack by pathogens as their first line of defense [54] and cell wall degradations occur during syncytium development due to the cell wall modifying and degrading proteins produced in cyst nematode infections [55]. The structural cell wall proteins such as hydroxyproline-rich glycoprotein (HRGPs) are catalyzed by an oxidizing system based on peroxidase and H<sub>2</sub>O<sub>2</sub> and contribute to the strength of cell walls during pine wood nematode responses [56]. Two HRGPs

(Phvul.001G044200 and Phvul.005G135700) were upregulated during the resistance response to SCN infection in the present study. In soybean, several genes involved in cell wall remodeling were differentially expressed in roots after infection by SCN [38, 57]. Similar responses were also observed in soybean after root knot nematode (*Meloidogyne incognita*) infection [58]. The balance between the formation of ROS and changes in the transcripts for cell wall remodeling enzymes seems to be important for the reaction of plants under stress conditions [59]. Interestingly, photorespiration is considered an important part of stress response in plants for preventing ROS accumulation and plays a major role in the readjustment of redox homeostasis [60]. In this study, 24 photosynthesis related genes were down regulated in the resistant genotype, while 38 photosynthesis related genes were down regulated in the susceptible genotype. This indicates suppression of the photosystem in the resistant and susceptible genotypes after SCN infection. A similar response was observed with SCN infection in soybean plants where both photosystem I and II were suppressed [22]. Different studies suggest that downregulation of photosystem activity is an adaptive response to biotic attack due to transition from growth- to defense-oriented metabolism [61].

The differential expression of pathogenesis-related (PR) genes under various abiotic and biotic stresses is a well-known phenomenon in legumes [62, 63]. Expressions of pathogenesis related genes PR-1, PR-2 and PR-5 were highly induced in *Arabidopsis* roots, but expression of PR-4 was not altered during infection by root-knot nematode [64]. Overexpression of these genes in roots may be explained by the potential functions of PR genes such as in cell wall modification and osmotic regulation [62]. In the current study, one PR-5 like receptor kinase (Phvul.004G155500) was up-regulated in the resistant genotype while one pathogenesis related family protein (Phvul.005G081500) was up-regulated in the susceptible genotype. One CAP (Cysteine-rich secretory proteins, Antigen 5, and Pathogenesis-related 1 protein) superfamily protein (Phvul.006G197100) was found down-regulated in resistant genotype after SCN infection. Similar kinds of responses were observed in soybean after SCN infection including a highly upregulated CC-NB-LRR gene, several heat shock protein genes and heat shock TFs, defense related WRKY TFs and PR genes [22, 39]. Molinari et al. [65] demonstrated that several PR proteins are differentially expressed after root-knot nematode infection in tomato. Nematode infection elicited salicylic acid-dependent systemic acquired resistance in plants. Similar pathways may be involved in dry bean in response to SCN infection, however further research is needed to confirm this hypothesis.

## Gene ontology analysis of differentially expressed genes

Differentially expressed genes in resistant and susceptible genotypes according to significant gene ontology (GO) under 'biological processes' categories are presented in Figs 7 and 8, respectively (S5 and S6 Tables). A major reprogramming of plant metabolism appears to occur during nematode-plant interactions. DEGs were represented into 10 different categories based on biological process through gene ontology (GO) in the resistant genotype. A significant number of genes (51 upregulated and 94 downregulated) were categorized under the GO term 'GO:0008152' representing metabolic process. Other apparent GO terms associated with differentially expressed genes were cellular process (GO:0009987) and cellular metabolic process (GO:0044237). Several GO terms, for example, single-organism metabolic process, transport, primary metabolic process, stress or defense responses, biotic stimulus, abiotic stimulus, signaling responses and cellular signaling were enriched in the resistant genotype. In the susceptible genotype, the enriched GO terms included cellular process (GO:0009987), metabolic process (GO:0008152), single organism process (GO:0044699), biological regulation (GO:0065007) and response to stimulus (GO:0050896). Nitrogen compound metabolic process (GO:0006807)

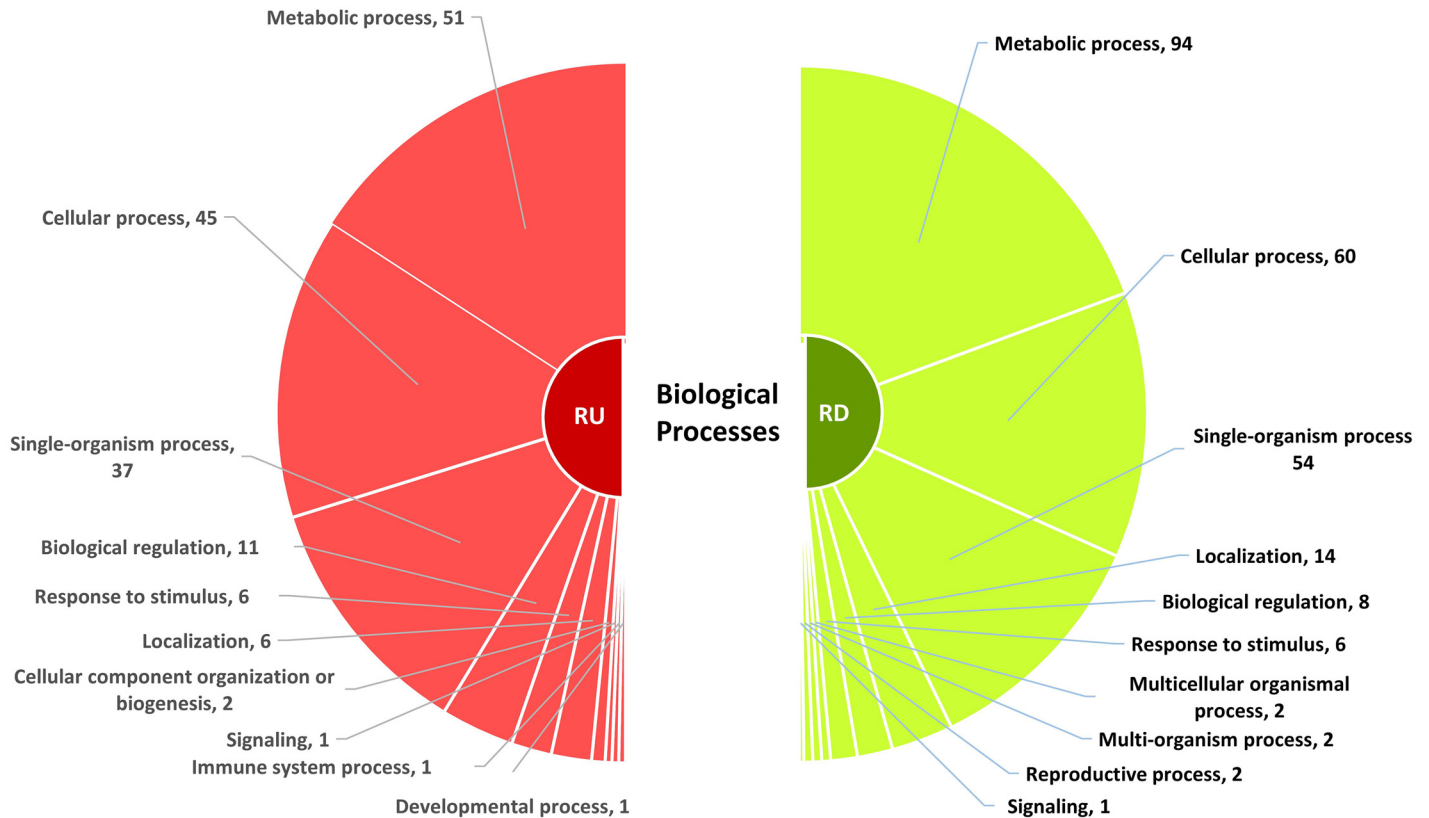

**Fig 7. Classification of differentially expressed genes based on biological processes in a common bean genotype resistant to *Heterodera glycines*.** Significant gene ontology categories ( $p < 0.05$ ) along with the number of genes involved are indicated for differentially expressed genes. RU = resistant upregulated; RD = resistant downregulated.

doi:10.1371/journal.pone.0159338.g007

seems to play an important role as this was enriched in both genotypes. Interestingly, a decrease in photosynthetic activity (GO:0015979) due to SCN infection was also observed in both genotypes. Hosseini and Matthews [40] also demonstrated that photosynthesis was one of the most suppressed GO processes in soybean following SCN infection. Suppression of photosynthesis related genes have also been observed in other pathogen-plant interactions as well. For example, transcripts encoding for ribulose biphosphate carboxylase and chlorophyll a/b-binding proteins were down-regulated during fungal infection in common bean [66].

### Validation of some differentially expressed genes

In order to validate the RNA-seq data, ten DEG having annotations in the reference genome were selected for quantitative real time PCR (qPCR) analysis. Locus number, functional annotation and primer sequences of these genes are presented in Table 2. These were genes encoding WRKY transcription factor, serine protease, ATOX1, glutathione S-transferase, wound induced protein, leucine rich repeat, heat shock protein, ENOD93, Thaumatin family and GAT ase1\_1. Relative expression profiles of DEGs in the resistant genotype evaluated using qPCR were in complete agreement with the RNA-seq data as depicted in Fig 9a. Similar expression patterns were observed in the susceptible genotype when qPCR and RNA-seq data were compared except for two genes (ENOD93 and Thaumatin family) as shown in Fig 9b. RNA for qPCR was extracted from different biological replicates than RNaseq samples therefore variability may exist in treatment/conditions. The WRKY transcription factor (Phvul.002G265400)

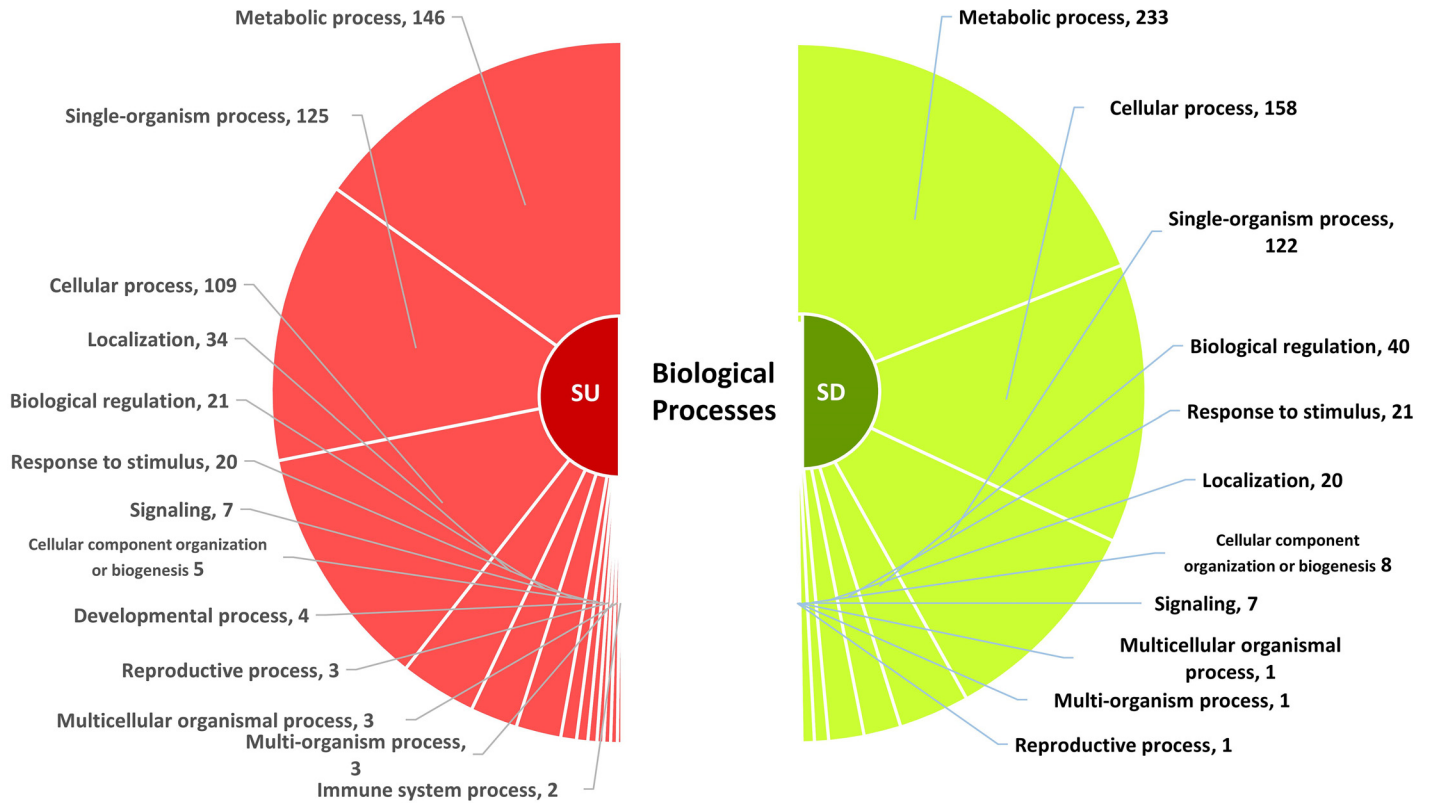

**Fig 8. Classification of differentially expressed genes based on biological processes in a common bean genotype susceptible to *Heterodera glycines*.** Significant gene ontology categories ( $p < 0.05$ ) along with number of genes involved are indicated for differentially expressed genes. SU = susceptible upregulated; SD = susceptible downregulated.

doi:10.1371/journal.pone.0159338.g008

(Fig 6) was also upregulated in both resistant and susceptible genotypes after SCN infection as occurred in their corresponding non-inoculated controls. WRKY transcription factors are known to take part in defense responses to viral, bacterial, fungal and nematode pathogens [39, 67, 68], which correlates with the present study. Likewise, Genes encoding wound induced

**Table 2. List of primers to amplify the selected genes for qPCR analysis.**

| Primer name               | Gene             | Functional annotation                                                        | Forward Primer (5'-3') | Reverse Primer (5'-3')  |
|---------------------------|------------------|------------------------------------------------------------------------------|------------------------|-------------------------|
| WRKY-TF                   | Phvul.002G265400 | WRKY transcription factor                                                    | AAGTCCGTGAAGAGCAATCC   | TGTCCTTTCCACCTTTTC      |
| Serine Protease           | Phvul.001G238100 | Subtilisin/Kexin-Related Serine Protease                                     | ATGAAGGATGAGGATTTCTGCG | GCAAAGCCACTGAACTTCG     |
| ATOX-1                    | Phvul.004G107100 | Copper Transport Protein ATOX1-Related                                       | ACAGCATCTGGCCTTTCTG    | GTGACACCATTTTCGTAGCTTTG |
| ENOD93                    | Phvul.009G198400 | Early nodulin 93 ENOD93 protein                                              | GGCAAGAGCCAATCTTAATCAC | TGAGAATGTGAGGGTGGAAATG  |
| Glutathione S-Transferase | Phvul.008G113600 | Glutathione S-Transferase                                                    | CGGAGTCCCTTGTGATTGTT   | ACTGATTTCCACGTAGCACC    |
| Thaumatococcus            | Phvul.008G118200 | Thaumatococcus                                                               | GAGCTCAAACAATGGCAAGAG  | GCACCTCCAAGTATCCCTG     |
| Wound induced protein     | Phvul.006G102300 | Wound-Induced Protein WIN-Related                                            | GCTTTCTGTGGACCCTCTG    | CTAATATCCAAGTCCAAGCCCC  |
| Leucine Rich Repeat       | Phvul.011G169300 | Leucine Rich Repeat                                                          | CTTGACTATGAGCTTTGTCCCC | TGCTTTCTCTGTAAGGTGTCC   |
| HSP                       | Phvul.011G016100 | Molecular chaperone (small heat shock protein)                               | CTTTCAACACCAACGCCATG   | GCTCAAGCTCCGAGTAGG      |
| GATase1_1                 | Phvul.002G214100 | GATase1_1; Subgroup of proteins having the Type 1 glutamine amidotransferase | TCGTGACCTTCTCAACTTGC   | ACCAATGTCCCAACCAGTAG    |

doi:10.1371/journal.pone.0159338.t002

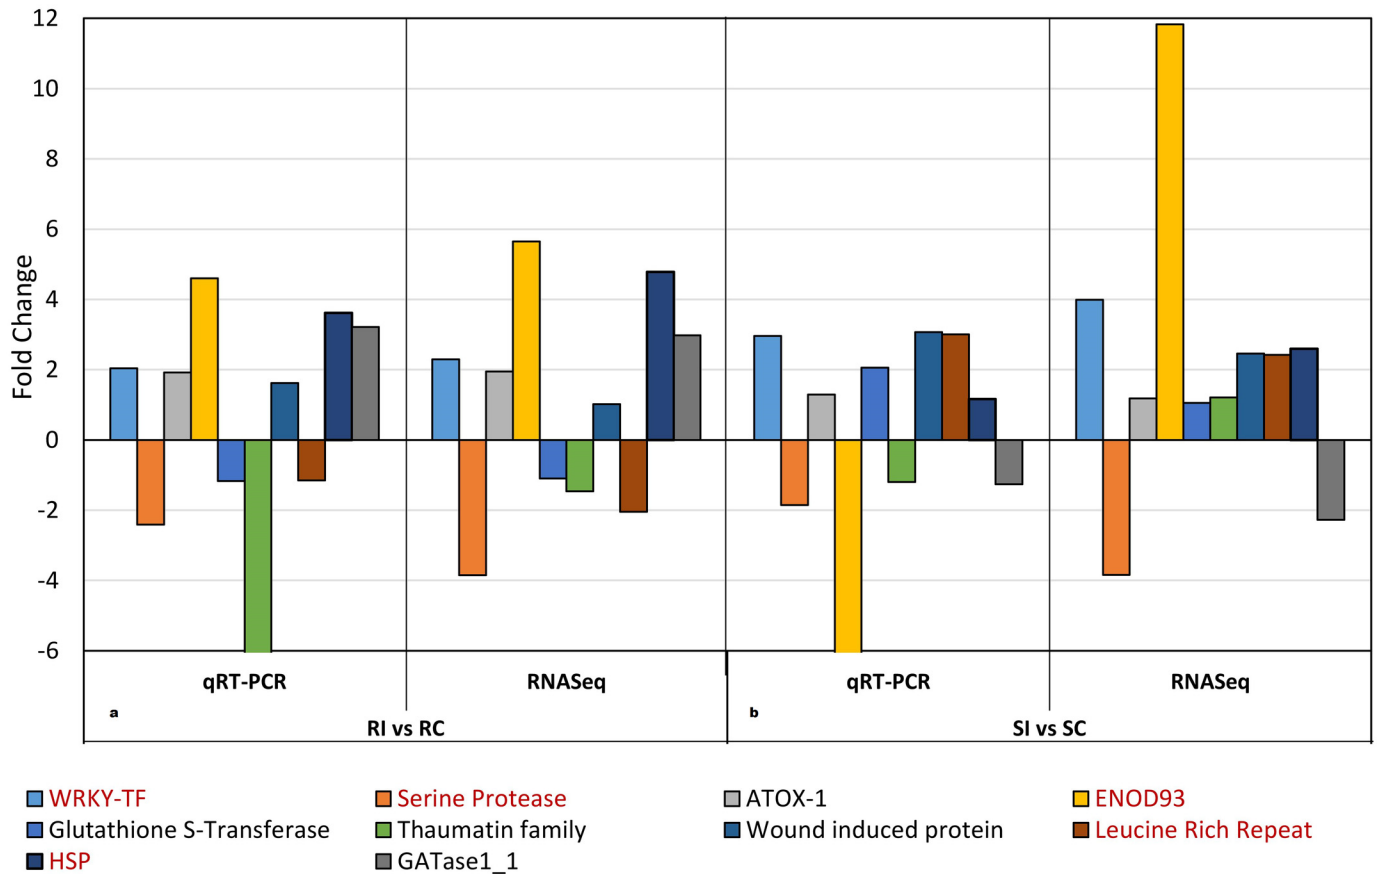

**Fig 9. Quantitative RT-PCR (qPCR) validation of the relative expression levels of genes selected from the RNA-seq analysis of common bean–*Heterodera glycines* interaction.** Expression profiles of 10 genes (color coded) as determined by qPCR and RNA-seq. The signal intensity of each transcript was normalized using Actin11. The x-axis indicates two groups of comparisons: a. resistant genotype inoculated vs. resistant genotype non-inoculated (RI vs. RC). b. susceptible genotype inoculated vs. susceptible genotype non-inoculated (SI vs. SC). The y-axis shows the fold change increase/decrease in expression level of the genes.

doi:10.1371/journal.pone.0159338.g009

protein (Phvul.006G102300) and heat shock protein (Phvul.011G016100) showed higher expression in both genotypes in RNA-seq and qPCR experiments. This agrees with the other studies on the involvement of these genes in abiotic and biotic stress responses [39, 41, 68]. Disease resistance proteins with leucine rich repeats, protein kinases, zinc finger domain proteins, RING domain proteins, cytochrome P450s, MYB and WRKY transcription activation families were identified in a genome wide association study conducted on soybean in search of genetic factors involved in SCN resistance [69]. These genes possibly play an important role in mediating plant pathogen interactions, and therefore may be potential targets to manipulate for enhancing common bean resistance to SCN.

## Conclusion

This is the first study on molecular responses of common bean during SCN infection. RNA sequencing technology was used to identify differentially expressed genes 8 days after inoculation of SCN resistant and susceptible genotypes of common bean. Importantly, we identified multiple TFs and protein kinases that were modulated by SCN infection. The differentially expressed genes identified are reported to be involved in similar pathways in the closely related host-pathogen interaction of soybean-SCN. Functional classification based on GO and



enrichment analyses demonstrated up-regulation of genes for 10 different categories in biological processes such as metabolic process, cellular process, single-organism process and response to stimuli. RNA-seq data was further validated through qPCR. Further characterization of some of the differentially expressed genes may lead to genetic engineering by over-expressing defense related genes or silencing genes that promote syncytium formation to manage the plant parasitic nematode infestations. Overall, comparative transcription profiling provided valuable information on SCN resistance in common bean, which can aid future development of resistant common bean varieties.

Research extended our understanding of the genetic architecture of SCN resistance in two different genetic backgrounds. The results also have potential implications for comparative gene discovery in legumes and development of new resources for identifying markers for marker assisted selection. Functional characterization of some of the candidate genes and genetic mapping of SCN resistance using the same genotypes used in this study are currently underway.

## Supporting Information

**S1 Table. List of genes differentially expressed in resistant genotype after SCN infection.**  
(XLSX)

**S2 Table. List of genes differentially expressed in susceptible genotype after SCN infection.**  
(XLSX)

**S3 Table. Functional annotation of differentially expressed genes in resistant genotype after SCN infection.**  
(XLSX)

**S4 Table. Functional annotation of differentially expressed genes in susceptible genotype after SCN infection.**  
(XLSX)

**S5 Table. GO and enrichment analysis of differentially expressed genes in resistant genotype after SCN infection.**  
(XLSX)

**S6 Table. GO and enrichment analysis of differentially expressed genes in susceptible genotype after SCN infection.**  
(XLSX)

## Acknowledgments

The authors thank Dr. Susilo Poromarto, NDSU, for initial screening of the common bean genotypes for SCN resistance. The authors thank Tracy Christianson for assistance with the research. Authors are thankful to Dr. Philip McClean, NDSU for giving valuable suggestions to improve the manuscript.

## Author Contributions

Conceived and designed the experiments: SJ BDN RB JO. Performed the experiments: SJ KC. Analyzed the data: SJ KC JR. Contributed reagents/materials/analysis tools: BDN RB JO. Wrote the paper: SJ KC JO RB BDN JR.

## References

1. Arnold DL, Lovell HC, Jackson RW, Mansfield JW. Pathogen profile *Pseudomonas syringae* pv *phaseolicola*: from 'has bean' to supermodel. *Mol Plant Pathol*. 2011; 12: 617–627
2. Broughton WJ, Hernaández G, Blair M, Beebe S, Gepts P, Vanderleyden J. Beans (*Phaseolus* spp.)—model food legumes. *Plant Soil*. 2003; 252: 55–128.
3. Wrather JA, Anderson TR, Arsyad DM, Tan Y, Ploper LD, Porta-Puglia A, et al. Soybean disease loss estimates for the top 10 soybean-producing countries in 1998. *Can J Plant Pathol*. 2001; 23: 115–121.
4. Tylka GL, Marett CC. Distribution of the soybean cyst nematode, *Heterodera glycines*, in the United States and Canada. 1954 to 2014. *Plant Health Prog*. 2014; doi: [10.1094/PHP-BR-14-0006](https://doi.org/10.1094/PHP-BR-14-0006)
5. Niblack TL. Soybean cyst nematode management reconsidered. *Plant Dis*. 2005; 89: 1020–1026.
6. Dong K, Barker KR, Opperman CH. Genetics of soybean-*Heterodera glycines* interactions. *J Nematol*. 1997; 29: 509–522. PMID: [19274188](https://pubmed.ncbi.nlm.nih.gov/19274188/)
7. Concibido VC, Diers BW, Arelli PR. A decade of QTL mapping for cyst nematode resistance in soybean. *Crop Sci*. 2004; 44: 1121–1131.
8. Cook DE, Bayless AM, Wang K, Guo X, Song Q, Jiang J, Bent AF. Distinct copy number, coding sequence, and locus methylation patterns underlie Rhg1-mediated soybean resistance to soybean cyst nematode. *Plant Physiol*. 2014; 165: 630–647. PMID: [24733883](https://pubmed.ncbi.nlm.nih.gov/24733883/)
9. Liu S, Kandoth PK, Warren SD, Yeckel G, Heinz R, Alden J, et al. A soybean cyst nematode resistance gene points to a new mechanism of plant resistance to pathogens. *Nature*. 2012; 492(7428): 256–260. doi: [10.1038/nature11651](https://doi.org/10.1038/nature11651) PMID: [23235880](https://pubmed.ncbi.nlm.nih.gov/23235880/)
10. Meksem K, Pantazopoulos P, Njiti VN, Hyten LD, Arelli PR, Lightfoot DA. 'Forrest' resistance to the soybean cyst nematode is bigenic: saturation mapping of the *Rhg1* and *Rhg4* loci. *Theor Appl Genet*. 2001; 103: 710–717.
11. Liu X, Liu S, Jamai A, Bendahmane A, Lightfoot DA, et al. Soybean cyst nematode resistance in soybean is independent of the *Rhg4* locus LRR-RLK Gene. *Funct Integr Genomics*. 2011; 11: 539–549. doi: [10.1007/s10142-011-0225-4](https://doi.org/10.1007/s10142-011-0225-4) PMID: [21541782](https://pubmed.ncbi.nlm.nih.gov/21541782/)
12. Smith JR, Young LD. Host suitability of diverse genotypes of *Phaseolus vulgaris* to multiple populations. *J Nematol*. 2003; 35: 23–28. PMID: [19265970](https://pubmed.ncbi.nlm.nih.gov/19265970/)
13. Poromarto SH, Nelson BD. Reproduction of soybean cyst nematode on dry bean cultivars adapted to North Dakota and northern Minnesota. *Plant Dis*. 2009; 93: 507–511.
14. Poromarto SH, Nelson BD, Goswami R. Effect of soybean cyst nematode on growth of dry bean in the field. *Plant Dis*. 2010; 94: 1299–1304.
15. Poromarto SH, Nelson BD, Goswami RS, Welsh M. Reproduction of soybean cyst nematode on accessions of the core collection of *Phaseolus vulgaris*. *Phytopathol*. 2012; 102: S4.93
16. McClean PE, Mamidi S, McConnell M, Chikara S, Lee R. Synteny mapping between common bean and soybean reveals extensive blocks of shared loci. *BMC Genomics*. 2010; 11: 184. doi: [10.1186/1471-2164-11-184](https://doi.org/10.1186/1471-2164-11-184) PMID: [20298570](https://pubmed.ncbi.nlm.nih.gov/20298570/)
17. Schmutz J, McClean PE, Mamidi S, Wu GA, Cannon SB, Grimwood J, et al. A reference genome for common bean and genome-wide analysis of dual domestications. *Nat Genet*. 2014; doi: [10.1038/ng.3008](https://doi.org/10.1038/ng.3008)
18. Schlueter JA, Goicoechea JL, Collura K, Gill N, Lin JY, Yu Y, et al. BAC-end sequence analysis and a draft physical map of the common bean (*Phaseolus vulgaris* L.) genome. *Trop Plant Biol*. 2008; 1: 40–48.
19. Wang Z, Gerstein M, Snyder M. RNA-Seq: A revolutionary tool for transcriptomics. *Nat Rev Genet*. 2009; 10: 57–63. doi: [10.1038/nrg2484](https://doi.org/10.1038/nrg2484) PMID: [19015660](https://pubmed.ncbi.nlm.nih.gov/19015660/)
20. Martin LBB, Fei Z, Giovannoni JJ, Rose JKC. Catalyzing plant science research with RNA-seq. *Front Plant Sci*. 2013; 4:66. doi: [10.3389/fpls.2013.00066](https://doi.org/10.3389/fpls.2013.00066) PMID: [23554602](https://pubmed.ncbi.nlm.nih.gov/23554602/)
21. Li XY, Wang X, Zhang S, Liu D, Duan Y, Dong W. Identification of soybean microRNAs involved in soybean cyst nematode infection by deep sequencing. *PLoS ONE*. 2012; 7(6): e39650. doi: [10.1371/journal.pone.0039650](https://doi.org/10.1371/journal.pone.0039650) PMID: [22802924](https://pubmed.ncbi.nlm.nih.gov/22802924/)
22. Li XY, Wang X, Zhang SP, Liu DW, Duan YX, Dong W. Comparative profiling of the transcriptional response to soybean cyst nematode infection of soybean roots by deep sequencing. *Chin Sci Bull*. 2011; 56: 1904–1911.
23. Xu DL, Long H, Liang JJ, Zhang J, Chen X, Li JL, et al. *De novo* assembly and characterization of the root transcriptome of *Aegilops variabilis* during an interaction with the cereal cyst nematode. *BMC Genomics*. 2012; 13: 133. doi: [10.1186/1471-2164-13-133](https://doi.org/10.1186/1471-2164-13-133) PMID: [22494814](https://pubmed.ncbi.nlm.nih.gov/22494814/)

24. Klink VP, Matthews BF. Emerging approaches to broaden resistance of soybean to soybean cyst nematode as supported by gene expression studies. *Plant Physiol.* 2009; 151: 1017–1022. doi: [10.1104/pp.109.144006](https://doi.org/10.1104/pp.109.144006) PMID: [19675146](https://pubmed.ncbi.nlm.nih.gov/19675146/)
25. Donald PA, Pierson PE St., Martin SK, Sellers PR, Noel GR, Macguidwin AE, et al. Assessing *Heterodera glycines*-resistant and susceptible cultivar yield response. *J Nematol.* 2006; 38: 76–82. PMID: [19259433](https://pubmed.ncbi.nlm.nih.gov/19259433/)
26. McConnell M, Mamidi S, Lee R, Chikara S, Rossi M, Papa R, et al. Syntenic relationships among legumes revealed using a gene-based genetic linkage map of common bean (*Phaseolus vulgaris* L.). *Theor Appl Genet.* 2010; 121: 1103–1116. doi: [10.1007/s00122-010-1375-9](https://doi.org/10.1007/s00122-010-1375-9) PMID: [20607211](https://pubmed.ncbi.nlm.nih.gov/20607211/)
27. Trapnell C, Roberts A, Goff L, Pertea G, Kim D, Kelley DR, et al. Differential gene and transcript expression analysis of RNA-seq experiments with TopHat and Cufflinks. *Nat Protocols.* 2012; 7: 562–578. doi: [10.1038/nprot.2012.016](https://doi.org/10.1038/nprot.2012.016) PMID: [22383036](https://pubmed.ncbi.nlm.nih.gov/22383036/)
28. Trapnell C, Pachter L, Salzberg SL. TopHat: discovering splice junctions with RNA-seq. *Bioinformatics.* 2009; 25: 1105–1111. doi: [10.1093/bioinformatics/btp120](https://doi.org/10.1093/bioinformatics/btp120) PMID: [19289445](https://pubmed.ncbi.nlm.nih.gov/19289445/)
29. Trapnell C, Williams BA, Pertea G, Mortazavi A, Kwan G, Baren MJ, et al. Transcript assembly and quantification by RNA-seq reveals unannotated transcripts and isoform switching during cell differentiation. *Nat Biotechnol.* 2010; 28: 511–515. doi: [10.1038/nbt.1621](https://doi.org/10.1038/nbt.1621) PMID: [20436464](https://pubmed.ncbi.nlm.nih.gov/20436464/)
30. Oliveros JC. VENNY. An interactive tool for comparing lists with Venn Diagrams. 2007; <http://bioinfoqg.cnb.csic.es/tools/venny/index.html>.
31. Conesa A, Götz S, Garcia-Gómez JM, Terol J, Talón M, Robles M, et al. Blast2GO: a universal tool for annotation, visualization and analysis in functional genomics research. *Bioinformatics.* 2005; 21: 3674–3676. PMID: [16081474](https://pubmed.ncbi.nlm.nih.gov/16081474/)
32. Ashburner M, Ball CM, Blake JA, Botstein D, Butler H, Cherry JM, et al. Gene ontology: tool for the unification of biology. The Gene Ontology Consortium. *Nat Genet.* 2000; 25: 25–29. PMID: [10802651](https://pubmed.ncbi.nlm.nih.gov/10802651/)
33. Ye J, Coulouris G, Zaretskaya I, Cutcutache I, Rozen S, Madden T. Primer-BLAST: A tool to design target-specific primers for polymerase chain reaction. *BMC Bioinformatics.* 2012; 13: 134. doi: [10.1186/1471-2105-13-134](https://doi.org/10.1186/1471-2105-13-134) PMID: [22708584](https://pubmed.ncbi.nlm.nih.gov/22708584/)
34. Hiz MC, Canher B, Niron H, Turet M. Transcriptome analysis of salt tolerant common bean (*Phaseolus vulgaris* L.) under saline conditions. *PLoS ONE.* 2014; 9(3): e92598. doi: [10.1371/journal.pone.0092598](https://doi.org/10.1371/journal.pone.0092598) PMID: [24651267](https://pubmed.ncbi.nlm.nih.gov/24651267/)
35. Schmitt DP, Shannon G. Differentiating soybean responses to *Heterodera glycines* races. *Crop Sci.* 1992; 32: 275–277.
36. Klink VP, Alkharouf N, MacDonald MH, Matthews BF. Laser capture microdissection (LCM) and expression analysis of *Glycine max* (soybean) syncytium containing root regions formed by the plant pathogen *Heterodera glycines* (soybean cyst nematode). *Planta.* 2005; 226: 1389–1409.
37. Klink VP, Overall CC, Alkharouf N, MacDonald MH, Matthews BF. A time course comparative microarray analysis of an incompatible and compatible response by *Glycine max* (soybean) to *Heterodera glycines* (soybean cyst nematode). *Planta.* 2007; 226: 1423–1447. PMID: [17653570](https://pubmed.ncbi.nlm.nih.gov/17653570/)
38. Klink VP, Overall CC, Alkharouf N, MacDonald MH, Matthews BF. Laser capture microdissection (LCM) and comparative microarray expression analysis of syncytial cells isolated from incompatible and compatible soybean roots infected by soybean cyst nematode (*Heterodera glycines*). *Planta.* 2007; 226: 1389–1409. PMID: [17668236](https://pubmed.ncbi.nlm.nih.gov/17668236/)
39. Kandoth PK, Ithal N, Recknor J, Maier T, Nettleton D, Baum T, et al. The soybean *Rhg1* locus for resistance to the soybean cyst nematode *Heterodera glycines* regulates expression of a large number of stress- and defense-related genes in degenerating feeding cells. *Plant Physiol.* 2011; 155: 1960–1975. doi: [10.1104/pp.110.167536](https://doi.org/10.1104/pp.110.167536) PMID: [21335526](https://pubmed.ncbi.nlm.nih.gov/21335526/)
40. Hosseini P, Matthews B. Regulatory interplay between soybean root and soybean cyst nematode during a resistant and susceptible reaction. *BMC Plant Biol.* 2014; 14: 300. doi: [10.1186/s12870-014-0300-9](https://doi.org/10.1186/s12870-014-0300-9) PMID: [25421055](https://pubmed.ncbi.nlm.nih.gov/25421055/)
41. Wan J, Vuong T, Jiao Y, Joshi T, Zhang H, Xu D, et al. Whole-genome gene expression profiling revealed genes and pathways potentially involved in regulating interactions of soybean with cyst nematode (*Heterodera glycines* Ichinohe). *BMC Genomics.* 2015; 16: 148 doi: [10.1186/s12864-015-1316-8](https://doi.org/10.1186/s12864-015-1316-8) PMID: [25880563](https://pubmed.ncbi.nlm.nih.gov/25880563/)
42. Klink VP, Hosseini P, MacDonald MH, Alkharouf NW, Matthews BF. Population-specific gene expression in the plant pathogenic nematode *Heterodera glycines* exists prior to infection and during the onset of a resistant or susceptible reaction in the roots of the *Glycine max* genotype Peking. *BMC Genomics.* 2009; 10: 111. doi: [10.1186/1471-2164-10-111](https://doi.org/10.1186/1471-2164-10-111) PMID: [19291306](https://pubmed.ncbi.nlm.nih.gov/19291306/)

43. Klink VP, Hosseini P, Matsye PD, Alkharouf NW, Matthews BF. Syncytium gene expression in *Glycine max* [PI 88788] roots undergoing a resistant reaction to the parasitic nematode *Heterodera glycines*. *Plant Physiol Biochem*. 2010; 48: 176–93. doi: [10.1016/j.plaphy.2009.12.003](https://doi.org/10.1016/j.plaphy.2009.12.003) PMID: [20138530](https://pubmed.ncbi.nlm.nih.gov/20138530/)
44. Hernández G, Ramírez M, Valde´s-López O, Tesfaye M, Graham MA, Czechowski T, et al. Phosphorus stress in common bean: root transcript and metabolic responses. *Plant Physiol*. 2007; 144: 752–767. PMID: [17449651](https://pubmed.ncbi.nlm.nih.gov/17449651/)
45. Garcia AV, Al-Yousif M, Hirt H. Role of AGC kinases in plant growth and stress responses. *Cell Mol Life Sci*. 2012; doi: [10.1007/s00018-012-1093-3](https://doi.org/10.1007/s00018-012-1093-3)
46. López CE, Acosta IF, Jara C, Pedraza F, Gaitán-Solís E, Gallego G, et al. Identifying resistance gene analogs associated with resistances to different pathogens in common bean. *Phytopathol*. 2003; 93: 88–95.
47. Xue R, Wu J, Zhu Z, Wang L, Wang X, Wang S et al. Differentially expressed genes in resistant and susceptible common bean (*Phaseolus vulgaris* L.) genotypes in response to *Fusarium oxysporum* f. sp. *phaseoli*. *PLoS ONE*. 2015; 10(6): e0127698. doi: [10.1371/journal.pone.0127698](https://doi.org/10.1371/journal.pone.0127698) PMID: [26030070](https://pubmed.ncbi.nlm.nih.gov/26030070/)
48. McHale L, Tan X, Koehl P, Michelmore RW. Plant NBS-LRR proteins: adaptable guards. *Genome Biol*. 2006; 7: 212. PMID: [16677430](https://pubmed.ncbi.nlm.nih.gov/16677430/)
49. Marone D, Russo MA, Laido G, De Leonardis AM, Mastrangelo AM. Plant nucleotide binding site-leucine rich repeat (NBS-LRR) genes: active guardians in host defense response. *Int J Mol Sci*. 2013; 14: 7302–7326. doi: [10.3390/ijms14047302](https://doi.org/10.3390/ijms14047302) PMID: [23549266](https://pubmed.ncbi.nlm.nih.gov/23549266/)
50. Van Der Vossen EAG, Van Der Voort JNAMR, Kanyuka K, Bendahmane A, Sandbrink H, Baulcombe D, et al. Homologues of a single resistance-gene cluster in potato confer resistance to distinct pathogens: a virus and a nematode. *Plant J*. 2000; 23: 567–576. PMID: [10972883](https://pubmed.ncbi.nlm.nih.gov/10972883/)
51. Kang YJ, Kim KH, Shim S, Yoon MY, Sun S, Kim MY, et al. Genome-wide mapping of NBS-LRR genes and their association with disease resistance in soybean. *BMC Plant Biol*. 2012; 12: 139. doi: [10.1186/1471-2229-12-139](https://doi.org/10.1186/1471-2229-12-139) PMID: [22877146](https://pubmed.ncbi.nlm.nih.gov/22877146/)
52. Brosché M, Blomster T, Salojärvi J, Cui F, Sipari N, Leppälä J, et al. Transcriptomics and Functional Genomics of ROS-Induced Cell Death Regulation by RADICAL-INDUCED CELL DEATH1. *PLoS Genet*. 2014; 10(2): e1004112. doi: [10.1371/journal.pgen.1004112](https://doi.org/10.1371/journal.pgen.1004112) PMID: [24550736](https://pubmed.ncbi.nlm.nih.gov/24550736/)
53. Lamb C, Dixon RA. The oxidative burst in plant disease resistance. *Annu Rev Plant Physiol Plant Mol Biol*. 1997; 48: 251–275. PMID: [15012264](https://pubmed.ncbi.nlm.nih.gov/15012264/)
54. Hüchelhoven R. Cell wall-associated mechanisms of disease resistance and susceptibility. *Annu Rev Phytopathol*. 2007; 45: 101–127. PMID: [17352660](https://pubmed.ncbi.nlm.nih.gov/17352660/)
55. Bohlmann H, Sobczak M. The plant cell wall in the feeding sites of cyst nematodes. *Front Plant Sci*. 2014; doi: [10.3389/fpls.2014.00089](https://doi.org/10.3389/fpls.2014.00089)
56. Hirao T, Fukatsu E, Watanabe A. Characterization of resistance to pine wood nematode infection in *Pinus thunbergii* using suppression subtractive hybridization. *BMC Plant Biol*. 2012; 12: 13. doi: [10.1186/1471-2229-12-13](https://doi.org/10.1186/1471-2229-12-13) PMID: [22272988](https://pubmed.ncbi.nlm.nih.gov/22272988/)
57. Ithal N, Recknor J, Nettleston D, Hearne L, Maier T, Baum TJ, et al. Developmental transcript profiling of cyst nematode feeding cells in soybean roots. *Mol Plant Microbe Interact*. 2007; 20: 293–305
58. Ibrahim HM, Hosseini P, Alkharouf NW, Hussein EH, Gamal El-Din Ael K, Aly MA, et al. Analysis of Gene expression in soybean (*Glycine max*) roots in response to the root knot nematode *Meloidogyne incognita* using microarrays and KEGG pathways. *BMC Genomics*. 2011; 12: 220. doi: [10.1186/1471-2164-12-220](https://doi.org/10.1186/1471-2164-12-220) PMID: [21569240](https://pubmed.ncbi.nlm.nih.gov/21569240/)
59. Tenhaken R. Cell wall remodeling under abiotic stress. *Front Plant Sci*. 2015; 5: 771. doi: [10.3389/fpls.2014.00771](https://doi.org/10.3389/fpls.2014.00771) PMID: [25709610](https://pubmed.ncbi.nlm.nih.gov/25709610/)
60. Voss I, Sunil B, Scheibe R, Raghavendra AS. Emerging concept for the role of photorespiration as an important part of abiotic stress response. *Plant Biol (Stuttg)*. 2013; 15(4): 713–722.
61. Bilgin DD, Zavala JA, Zhu J, Clough SJ, Ort DR, DeLucia EH. Biotic stress globally downregulates photosynthesis genes. *Plant Cell Environ*. 2010; 33: 1597–1613. doi: [10.1111/j.1365-3040.2010.02167.x](https://doi.org/10.1111/j.1365-3040.2010.02167.x) PMID: [20444224](https://pubmed.ncbi.nlm.nih.gov/20444224/)
62. Van Loon IC, Rep M, Pieterse CMJ. Significance of inducible defense-related proteins in infected plants. *Annu Rev Phytopathol*. 2006; 44: 135–162. PMID: [16602946](https://pubmed.ncbi.nlm.nih.gov/16602946/)
63. Jain S, Kumar D, Jain M, Chaudhary P, Deswal R, Sarin NB. Ectopic overexpression of a salt stress-induced pathogenesis-related class 10 protein (PR10) gene from peanut (*Arachis hypogaea* L.) affords broad spectrum abiotic stress tolerance in transgenic tobacco. *Plant Cell Tiss Org Cult*. 2012; 109: 19–31.
64. Hamamouch N, Li C, Seo PJ, Park C, Davis EL. Expression of *Arabidopsis* pathogenesis-related genes during nematode infection. *Mol Plant Pathol*. 2011; 12: 355–364. doi: [10.1111/j.1364-3703.2010.00675.x](https://doi.org/10.1111/j.1364-3703.2010.00675.x) PMID: [21453430](https://pubmed.ncbi.nlm.nih.gov/21453430/)

65. Molinari S, Fanelli E, Leonetti P. Expression of tomato salicylic acid (SA)-responsive pathogenesis-related genes in Mi-1-mediated and SA-induced resistance to root-knot nematodes. *Mol Plant Pathol*. 2014; 15: 255–264. doi: [10.1111/mpp.12085](https://doi.org/10.1111/mpp.12085) PMID: [24118790](https://pubmed.ncbi.nlm.nih.gov/24118790/)
66. Oblessuc PR, Borges A, Chowdhury B, Caldas DGG, Tsai SM, Camargo LEA, et al. Dissecting *Phaseolus vulgaris* innate immune system against *Colletotrichum lindemuthianum* infection. *PLoS ONE*. 2012; 7(8): e43161. doi: [10.1371/journal.pone.0043161](https://doi.org/10.1371/journal.pone.0043161) PMID: [22912818](https://pubmed.ncbi.nlm.nih.gov/22912818/)
67. Eulgem T, Somssich IE. Networks of WRKY transcription factors in defense signaling. *Curr Opin Plant Biol*. 2007; 10: 366–371 PMID: [17644023](https://pubmed.ncbi.nlm.nih.gov/17644023/)
68. Ayyappan V, Kalavacharla V, Thimmapuram J, Bhide K, Sripathi V, Smolinski T, et al. Genome-wide profiling of histone modifications (H3K<sub>9me2</sub> and H4K12<sub>ac</sub>) and gene expression in rust (*Uromyces appendiculatus*) inoculated common bean (*Phaseolus vulgaris* L.). *PLoS ONE*. 2015; 10(7): e0132176. doi: [10.1371/journal.pone.0132176](https://doi.org/10.1371/journal.pone.0132176) PMID: [26167691](https://pubmed.ncbi.nlm.nih.gov/26167691/)
69. Han Y, Zhao X, Cao G, Wang Y, Li Y, Liu D, et al. Genetic characteristics of soybean resistance to HG type 0 and HG type 1.2.3.5.7 of the cyst nematode analyzed by genome-wide association mapping. *BMC Genomics*. 2015; 16: 598. doi: [10.1186/s12864-015-1800-1](https://doi.org/10.1186/s12864-015-1800-1) PMID: [26268218](https://pubmed.ncbi.nlm.nih.gov/26268218/)
